# Supplementary material
Source: publisher site journal article supplement (https://www.spandidos-publications.com/6997/downloadSupplementary)
Supplement: Supplementary file 1 [file downloadSupplementary]

## Sheet: Table SIV. NGS-PCR-IHC
Table SIV. MMR status from IHC, MSI status from PCR, and MSI status from MSIPeak for each sample, inlcuding the status for each locus or protein. +, positive; -, negative; MMR, mismatch repair; dMMR, MMR deficiency; pMMR, MMR proficieny; MSI, microsatellite instability; MSI-H, high MSI; MSS, microsatellite stability; IHC, immunohistochemical; NGS, next-generation sequencing.
Sample no.	NGS						PCR						IHC
	NR-21	MONO-27	NR-24	BAT-25	BAT-26	Result	NR-21	MONO-27	NR-24	BAT-25	BAT-26	Result	MLH1	MSH2	MSH6	PMS2	Result
18P	-	-	-	-	-	MSS	-	-	-	-	-	MSS	+	+	+	-	dMMR
19P	-	-	-	-	-	MSS	-	-	-	-	-	MSS	+	+	+	+	pMMR
20P	+	+	-	-	+	MSI-H	-	-	-	-	-	MSS	+	+	+	-	dMMR
2100755-1	-	-	-	-	-	MSS	-	-	-	-	-	MSS	+	+	+	+	pMMR
2101402-10	-	-	-	-	-	MSS	-	-	-	-	-	MSS	+	+	+	+	pMMR
2101570-6	-	-	-	-	-	MSS	-	-	-	-	-	MSS	+	+	+	+	pMMR
2101576-5	-	-	-	-	-	MSS	-	-	-	-	-	MSS	+	+	+	+	pMMR
2101676-8	-	-	-	-	-	MSS	-	-	-	-	-	MSS	+	+	+	+	pMMR
2101821-2	-	-	-	-	-	MSS	-	-	-	-	-	MSS	+	+	+	+	pMMR
2103200-2	-	-	-	-	-	MSS	-	-	-	-	-	MSS	+	+	+	+	pMMR
2103224-2	-	-	-	-	-	MSS	-	-	-	-	-	MSS	+	+	+	+	pMMR
2104410-2	-	-	-	-	+	MSS	-	-	-	-	-	MSS	+	+	+	+	pMMR
2104957-8	-	-	-	-	-	MSS	-	-	-	-	-	MSS	+	+	+	+	pMMR
2105386-15	+	-	-	-	+	MSI-H	-	-	-	-	-	MSS	-	+	-	-	dMMR
2105694-2	-	+	-	-	+	MSI-H	-	-	-	-	-	MSS	-	+	+	-	dMMR
2106351-2	-	-	-	-	-	MSS	-	-	-	-	-	MSS	+	+	+	+	pMMR
2106614-1	-	-	-	+	+	MSI-H	-	-	-	-	-	MSS	-	+	-	-	dMMR
2107379-7	-	-	-	-	-	MSS	-	-	-	-	-	MSS	-	+	+	-	dMMR
2107616-3	-	-	-	-	-	MSS	-	-	-	-	-	MSS	+	+	+	+	pMMR
2108147-2	-	-	-	-	-	MSS	-	-	-	-	-	MSS	+	+	+	+	pMMR
2109122-5	-	-	-	-	-	MSS	-	-	-	-	-	MSS	+	+	+	+	pMMR
2109254-8	+	+	+	-	-	MSI-H	-	-	-	-	-	MSS	+	+	+	+	pMMR
2112455-4	+	+	+	+	+	MSI-H	-	-	-	+	-	MSS	+	+	-	+	dMMR
2112955-2	+	-	-	-	-	MSS	-	-	-	-	-	MSS	+	+	+	+	pMMR
2112976-5	-	-	-	+	-	MSS	-	-	-	-	-	MSS	+	+	+	+	pMMR
2114543-2	-	-	-	-	-	MSS	-	-	-	-	-	MSS	+	+	+	+	pMMR
2114645-5	+	-	-	+	+	MSI-H	-	-	-	-	-	MSS	-	+	+	-	dMMR
2115207-5	+	+	+	+	+	MSI-H	+	+	+	+	+	MSI-H	-	+	+	-	dMMR
2117885-5	-	-	-	+	-	MSS	-	-	-	-	-	MSS	-	+	+	-	dMMR
2118981-1	-	-	-	-	-	MSS	-	-	-	-	-	MSS	+	+	+	+	pMMR
2119192-15	-	-	-	-	+	MSS	-	-	-	-	-	MSS	+	+	+	+	pMMR
2119672-12	-	-	-	-	-	MSS	-	-	-	-	-	MSS	+	+	+	+	pMMR
2120354-9	-	+	-	-	+	MSI-H	-	-	-	-	-	MSS	+	+	-	+	dMMR
2120399-7	+	+	+	+	+	MSI-H	-	+	+	+	+	MSI-H	+	+	+	-	dMMR
2121315-6	-	-	-	-	-	MSS	-	-	-	-	-	MSS	+	+	+	+	pMMR
2121324-6	-	-	-	-	-	MSS	-	-	-	-	-	MSS	+	+	+	+	pMMR
2121424-7	-	-	-	-	-	MSS	-	-	-	-	-	MSS	+	+	+	+	pMMR
2121745-4	-	-	-	-	-	MSS	-	-	-	-	-	MSS	+	+	+	+	pMMR
2122236-2	-	-	-	-	-	MSS	-	-	-	-	-	MSS	+	+	+	+	pMMR
2122474-5	-	-	-	-	-	MSS	-	-	-	-	-	MSS	+	+	+	+	pMMR
2123754-1	-	-	-	-	+	MSS	-	-	-	-	-	MSS	+	+	+	+	pMMR
2123975-1	-	-	-	-	-	MSS	-	-	-	-	-	MSS	+	+	+	+	pMMR
2124496-1	+	-	-	-	-	MSS	-	-	-	-	-	MSS	+	+	+	+	pMMR
2125583-6	-	-	-	+	-	MSS	-	-	-	-	-	MSS	+	+	+	+	pMMR
2125702-2	-	-	-	-	-	MSS	-	-	-	-	-	MSS	+	+	+	+	pMMR
2125829-1	-	-	-	-	-	MSS	-	-	-	-	-	MSS	+	+	+	+	pMMR
2126093-5	-	-	-	-	+	MSS	-	-	-	-	-	MSS	+	+	+	+	pMMR
2126297-5	-	-	-	-	-	MSS	-	-	-	-	-	MSS	+	+	+	+	pMMR
2126326-7	-	-	-	-	-	MSS	-	-	-	-	-	MSS	+	+	+	+	pMMR
2126358-5	-	-	-	-	-	MSS	-	-	-	-	-	MSS	+	+	+	+	pMMR
2127218-5	+	+	+	-	+	MSI-H	-	-	-	-	-	MSS	+	+	+	+	dMMR
2127332-5	+	+	-	+	+	MSI-H	+	+	-	-	+	MSI-H	-	+	+	-	dMMR
2127501-6	-	-	-	-	-	MSS	-	-	-	-	-	MSS	+	+	+	+	pMMR
2128435-5	+	-	-	+	+	MSI-H	-	-	-	-	-	MSS	-	+	+	-	dMMR
2128916-6	-	-	-	-	-	MSS	-	-	-	-	-	MSS	+	+	+	+	pMMR
2129804-36	-	-	-	-	-	MSS	-	-	-	-	-	MSS	+	+	+	+	pMMR
2129902-10	-	-	-	-	-	MSS	-	-	-	-	-	MSS	+	+	+	+	pMMR
2130197-6	-	-	-	-	-	MSS	-	-	-	-	-	MSS	+	+	+	+	pMMR
21P	-	-	-	-	-	MSS	-	-	-	-	-	MSS	+	+	+	+	pMMR
2200721-5	-	-	-	-	-	MSS	-	-	-	-	-	MSS	+	+	+	+	pMMR
2201054-3	-	-	-	-	-	MSS	-	-	-	-	-	MSS	+	+	+	+	pMMR
2201191-4	-	-	-	-	-	MSS	-	-	-	-	-	MSS	+	+	+	+	pMMR
2201703-5	-	-	-	-	-	MSS	-	-	-	-	-	MSS	+	+	+	+	pMMR
2201807-9	-	-	-	-	+	MSS	-	-	-	-	-	MSS	+	+	+	+	pMMR
2202205-3	-	-	-	-	+	MSS	-	-	-	-	-	MSS	+	+	+	+	pMMR
2202360-12	-	-	-	-	-	MSS	-	-	-	-	-	MSS	+	+	+	+	pMMR
2203032-7	+	+	+	+	+	MSI-H	+	+	+	+	+	MSI-H	+	+	+	-	dMMR
2203579-3	-	-	-	-	-	MSS	-	-	-	-	-	MSS	+	+	+	+	pMMR
2203705-5	-	-	-	-	+	MSS	-	-	-	-	-	MSS	+	+	+	+	pMMR
2204584-8	-	-	-	-	-	MSS	-	-	-	-	-	MSS	+	+	+	+	pMMR
2205038-4	-	-	-	-	-	MSS	-	-	-	-	-	MSS	+	+	+	+	pMMR
2205876-6	-	-	-	-	-	MSS	-	-	-	-	-	MSS	+	+	+	+	pMMR
2206205-7	-	-	-	-	-	MSS	-	-	-	-	-	MSS	+	+	+	+	pMMR
2206554-11	-	-	-	+	-	MSS	-	-	-	-	-	MSS	+	+	+	+	pMMR
2207154-3	-	-	-	-	+	MSS	-	-	-	-	-	MSS	+	+	+	+	pMMR
2207237-5	+	+	+	+	+	MSI-H	-	+	-	-	-	MSI-H	+	+	+	+	pMMR
2207384-2	-	+	+	+	-	MSI-H	-	-	-	-	-	MSS	+	+	+	+	pMMR
2208071-8	-	-	-	-	-	MSS	-	-	-	-	-	MSS	+	+	+	+	pMMR
2208154-4	-	-	-	-	-	MSS	-	-	-	-	-	MSS	+	+	+	+	pMMR
2208401-4	-	-	-	-	-	MSS	-	-	-	-	-	MSS	+	+	+	+	pMMR
2208788-4	+	+	+	+	+	MSI-H	+	+	+	+	+	MSI-H	+	-	-	+	dMMR
2208912-3	-	-	-	-	+	MSS	-	-	-	-	-	MSS	+	+	+	+	pMMR
2209344-12	-	-	-	-	-	MSS	-	-	-	-	-	MSS	+	+	+	+	pMMR
2209929-6	+	-	-	+	+	MSI-H	-	-	-	-	-	MSS	+	+	+	+	pMMR
2210007-6	-	-	-	-	-	MSS	-	-	-	-	-	MSS	+	+	+	+	pMMR
2210082-1	-	-	-	-	-	MSS	-	-	-	-	-	MSS	+	+	+	+	pMMR
2210085-1	-	+	-	-	+	MSI-H	-	-	-	-	-	MSS	+	+	-	+	dMMR
2210522-1	-	-	-	-	-	MSS	-	-	-	-	-	MSS	+	+	+	+	pMMR
2214740-4	-	-	-	-	+	MSS	-	-	-	-	-	MSS	+	+	+	+	pMMR
2215007-5	+	+	+	-	+	MSI-H	-	-	-	-	-	MSS	+	+	-	+	dMMR
2215078-3	-	-	-	-	-	MSS	-	-	-	-	-	MSS	+	+	+	+	pMMR
2215115-13	+	-	-	-	+	MSI-H	-	-	-	-	-	MSS	+	+	+	-	dMMR
2215529-8	-	-	-	+	-	MSS	-	-	-	-	-	MSS	+	+	+	+	pMMR
2216304-3	-	-	-	-	-	MSS	-	-	-	-	-	MSS	+	+	+	+	pMMR
2218475-5	+	-	-	+	+	MSI-H	-	-	-	+	-	MSI-H	+	+	+	+	pMMR
2218490-3	-	-	-	-	-	MSS	-	-	-	-	-	MSS	+	+	+	+	pMMR
2221241-10	-	-	-	-	-	MSS	-	-	-	-	-	MSS	+	+	+	+	pMMR
22P	-	-	-	-	-	MSS	-	-	-	-	-	MSS	+	+	+	+	pMMR
23P	-	-	-	-	-	MSS	-	-	-	-	-	MSS	+	+	+	+	pMMR
24P	-	-	-	-	+	MSS	-	-	-	-	-	MSS	+	+	+	+	pMMR
25P	-	-	-	-	-	MSS	-	-	-	-	-	MSS	+	+	+	+	pMMR
26P	-	-	-	-	-	MSS	-	-	-	-	-	MSS	+	+	+	+	pMMR
27P	-	-	-	+	+	MSI-H	-	-	-	+	+	MSI-H	+	+	-	+	dMMR
28P	-	-	-	-	-	MSS	-	-	-	-	-	MSS	+	+	+	+	pMMR
29P	-	-	-	-	-	MSS	-	-	-	-	-	MSS	+	+	+	+	pMMR
30P	-	-	-	-	-	MSS	-	-	-	-	-	MSS	+	+	+	+	pMMR
31P	-	-	-	-	-	MSS	-	-	-	-	-	MSS	+	+	+	+	pMMR
32P	-	-	-	-	-	MSS	-	-	-	-	-	MSS	+	+	+	+	pMMR
33P	-	-	-	-	-	MSS	-	-	-	-	-	MSS	+	+	+	+	pMMR
34P	-	-	-	-	-	MSS	-	-	-	-	-	MSS	+	+	+	+	pMMR
35P	-	-	-	-	-	MSS	-	-	-	-	-	MSS	+	+	+	+	pMMR
37P	-	-	-	-	-	MSS	-	-	-	-	-	MSS	+	+	+	+	pMMR
38P	-	-	-	-	+	MSS	-	-	-	-	-	MSS	+	+	+	+	pMMR
39P	-	-	-	-	+	MSS	-	-	-	-	-	MSS	+	+	+	+	pMMR
40P	-	-	-	-	-	MSS	-	-	-	-	-	MSS	+	+	+	+	pMMR
41P	+	-	-	+	+	MSI-H	+	+	-	+	-	MSI-H	+	+	+	-	dMMR
42P	+	-	-	-	+	MSI-H	-	-	-	-	-	MSS	-	+	+	-	dMMR
44P	-	-	-	-	-	MSS	-	-	-	-	-	MSS	+	+	+	+	pMMR
45P	+	+	-	+	+	MSI-H	-	-	-	+	-	MSS	-	+	+	-	dMMR
46P	-	-	-	-	-	MSS	-	-	-	-	-	MSS	+	+	+	+	pMMR
47P	-	-	-	-	-	MSS	-	-	-	-	-	MSS	+	+	+	+	pMMR
48P	-	-	-	-	-	MSS	-	-	-	-	-	MSS	+	+	+	+	pMMR
49P	-	-	-	-	-	MSS	-	-	-	-	-	MSS	+	+	+	+	pMMR
50P	+	+	+	+	+	MSI-H	-	-	+	-	+	MSI-H	-	+	+	-	dMMR
51P	-	-	-	-	-	MSS	-	-	-	-	-	MSS	+	+	+	+	pMMR
52P	-	-	-	-	+	MSS	-	-	-	-	-	MSS	+	+	+	+	pMMR
53P	-	-	-	-	-	MSS	-	-	-	-	-	MSS	+	+	+	+	pMMR
54P	-	-	-	-	-	MSS	-	-	-	-	-	MSS	+	+	+	+	pMMR
55P	-	-	-	-	-	MSS	-	-	-	-	-	MSS	+	+	+	+	pMMR
56P	-	-	-	-	-	MSS	-	-	-	-	-	MSS	+	+	+	+	pMMR
57P	-	-	-	-	-	MSS	-	-	-	-	-	MSS	+	+	+	+	pMMR
58P	-	-	-	-	-	MSS	-	-	-	-	-	MSS	+	+	+	+	pMMR
59P	-	-	-	-	-	MSS	-	-	-	-	-	MSS	+	+	+	+	pMMR
60P	-	+	-	-	+	MSI-H	-	-	-	-	-	MSS	+	-	-	+	dMMR
61P	-	+	-	-	+	MSI-H	-	-	-	-	-	MSS	-	+	+	-	dMMR
63P	-	-	-	-	-	MSS	-	-	-	-	-	MSS	+	+	+	+	pMMR
64P	-	-	-	-	+	MSS	-	-	-	-	-	MSS	+	+	+	+	pMMR
65P	-	-	-	-	-	MSS	-	-	-	-	-	MSS	+	+	+	+	pMMR
66P	-	+	-	-	+	MSI-H	-	-	-	-	-	MSS	-	+	+	-	dMMR
67P	+	+	-	+	-	MSI-H	-	+	-	-	-	MSI-H	+	+	+	-	dMMR
68P	-	-	-	-	-	MSS	-	-	-	-	-	MSS	+	+	+	+	pMMR
69P	-	-	-	-	-	MSS	-	-	-	-	-	MSS	+	+	+	+	pMMR
71P	-	-	-	-	-	MSS	-	-	-	-	-	MSS	+	+	+	+	pMMR
73P	-	-	-	-	-	MSS	-	-	-	-	-	MSS	+	+	+	+	pMMR
74P	-	-	-	+	+	MSI-H	-	+	-	-	-	MSS	+	+	+	-	dMMR
75P	-	-	-	-	-	MSS	-	-	-	-	-	MSS	+	+	+	+	pMMR
76P	-	-	-	-	-	MSS	-	-	-	-	-	MSS	+	+	+	+	pMMR
77P	-	-	-	-	+	MSS	-	-	-	-	-	MSS	+	+	+	+	pMMR
78P	-	-	-	-	-	MSS	-	-	-	-	-	MSS	+	+	+	+	pMMR
79P	-	-	-	-	-	MSS	-	-	-	-	-	MSS	+	+	+	+	pMMR
A101	+	+	+	+	+	MSI-H	-	+	-	-	+	MSI-H	-	+	+	-	dMMR
A102	+	+	+	+	+	MSI-H	+	+	+	+	+	MSI-H	+	-	-	+	dMMR
A44	-	-	-	-	-	MSS	-	-	-	-	-	MSS	+	+	+	+	pMMR
A45	-	-	-	-	-	MSS	-	-	-	-	-	MSS	+	+	+	+	pMMR
A46	-	-	-	-	-	MSS	-	-	-	-	-	MSS	+	+	+	+	pMMR
A47	-	-	-	-	-	MSS	-	-	-	-	-	MSS	+	+	+	+	pMMR
A48	-	-	-	-	-	MSS	-	-	-	-	-	MSS	+	+	+	+	pMMR
A49	+	+	+	+	+	MSI-H	+	+	+	+	+	MSI-H	-	+	+	-	dMMR
A50	+	-	+	+	+	MSI-H	-	-	+	+	-	MSI-H	-	+	+	-	dMMR
A54	+	+	+	+	+	MSI-H	-	-	+	-	-	MSS	-	+	+	-	dMMR
A57	-	-	-	-	-	MSS	-	-	-	-	-	MSS	+	+	+	+	pMMR
A58	-	-	-	-	-	MSS	-	+	-	-	-	MSS	+	+	+	+	pMMR
A59	-	-	-	-	-	MSS	-	-	-	-	-	MSS	+	+	+	+	pMMR
A61	-	-	-	-	-	MSS	-	-	-	-	-	MSS	+	+	+	+	pMMR
A62	-	-	-	-	-	MSS	-	-	-	-	-	MSS	+	+	+	+	pMMR
A64	-	-	-	-	-	MSS	-	-	-	-	-	MSS	+	+	+	+	pMMR
A65	-	-	-	-	-	MSS	-	-	-	-	-	MSS	+	+	+	+	pMMR
A66	-	-	-	-	-	MSS	-	-	-	-	-	MSS	+	+	+	+	pMMR
A67	-	-	-	-	-	MSS	-	-	-	-	-	MSS	+	+	+	+	pMMR
A68	-	-	-	-	-	MSS	-	-	-	-	-	MSS	+	+	+	+	pMMR
A72	-	-	-	-	-	MSS	-	-	-	-	-	MSS	+	+	+	+	pMMR
A73	-	-	-	-	-	MSS	-	-	-	-	-	MSS	+	+	+	+	pMMR
A75	-	-	-	-	-	MSS	-	-	-	-	-	MSS	+	+	+	+	pMMR
A85	-	-	-	-	-	MSS	-	-	-	-	-	MSS	+	+	+	+	pMMR
A86	+	-	-	-	+	MSI-H	+	+	-	-	-	MSS	-	+	+	-	dMMR
A88	-	-	-	-	-	MSS	-	-	-	-	-	MSS	+	+	+	+	pMMR
A89	+	+	+	+	+	MSI-H	+	+	+	+	+	MSI-H	+	-	-	+	dMMR
A94	-	-	-	-	+	MSS	-	-	-	-	-	MSS	+	+	+	+	pMMR
A95	+	+	-	+	+	MSI-H	-	+	-	+	+	MSI-H	-	+	+	-	dMMR
A96	+	+	+	+	+	MSI-H	+	+	-	+	-	MSI-H	-	+	+	-	dMMR
A97	-	-	-	-	-	MSS	-	-	-	-	-	MSS	+	+	+	+	pMMR
